# Supplementary material for: Optimized design and in vivo application of optogenetically functionalized Drosophila dopamine receptors
Source: PubMed Central journal article supplement (PMC10730509; doi:10.1038/s41467-023-43970-0), 2023-12-19
Supplement: 41467_2023_43970_MOESM1_ESM.pdf [file 41467_2023_43970_MOESM1_ESM.pdf]

## **Supplementary Information**

### **Optimized design and in vivo application of optogenetically functionalized *Drosophila* dopamine receptors**

Fangmin Zhou, Alexandra-Madelaine Tichy, Bibi Nusreen Imambocus, Shreyas Sakharwade, Francisco J. Rodriguez Jimenez, Marco González Martínez, Ishrat Jahan, Margarita Habib, Nina Wilhelmy, Vanessa Burre, Tatjana Lömker, Kathrin Sauter, Charlotte Helfrich-Förster, Jan Pielage, Ilona C. Grunwald Kadow, Harald Janovjak, Peter Soba

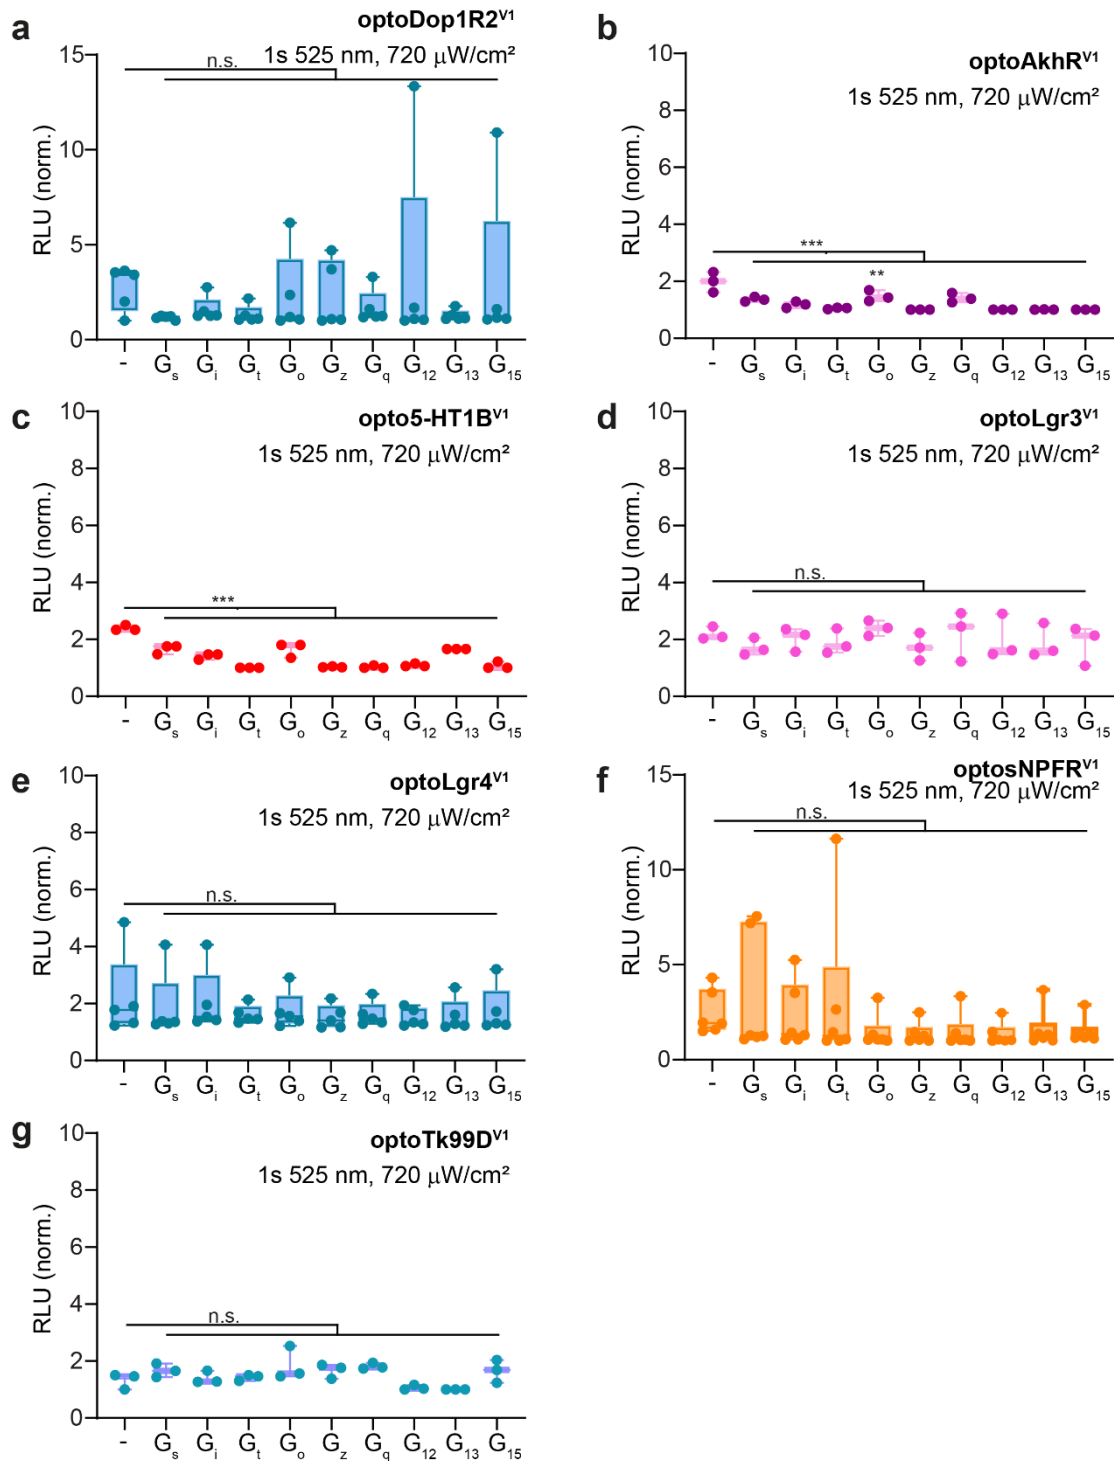

**Supplementary Figure 1. Validation of optoXR<sup>V1</sup> function in the G<sub>Sx</sub> assay.**

**a-g.** Analysis of optoXR<sup>V1</sup> function in live HEK293 cells using the G<sub>Sx</sub> assay to probe specific G protein activation. **a.** G protein coupling properties of optoDop1R2<sup>V1</sup> after activation with light (1 s, 525 nm, 720 μW/cm<sup>2</sup>). Maximum normalized responses are shown as relative light units (RLU, n=5 independent experiments, n.s. p>0.05). **b.** G protein coupling properties of optoAkhR<sup>V1</sup> after activation with light (1 s, 525 nm, 720 μW/cm<sup>2</sup>). Maximum normalized responses are shown as relative light units (RLU, n=3 independent experiments, \*\*p<0.01, \*\*\*p<0.001, one-way ANOVA with Dunnett's *post-hoc* test). **c.** G protein coupling properties of opto5HT1B<sup>V1</sup> after activation with light (1 s, 525 nm, 720 μW/cm<sup>2</sup>). Maximum normalized responses are shown as relative light units (RLU, n=3 independent experiments, \*\*\*p<0.001, one-way ANOVA with Dunnett's *post-hoc* test). **d.** G protein coupling properties of optoLgr3

<sup>V1</sup> after activation with light (1 s, 525 nm, 720  $\mu\text{W}/\text{cm}^2$ ). Maximum normalized responses are shown as relative light units (RLU, n=3 independent experiments, n.s.  $p>0.05$ , one-way ANOVA with Dunnett's *post-hoc* test). **e.** G protein coupling properties of optoLgr4<sup>V1</sup> after activation with light (1s 525 nm, 720 $\mu\text{W}/\text{cm}^2$ ). Maximum normalized responses are shown as relative light units (RLU, n=5, n.s.  $p>0.05$ , one-way ANOVA with Dunnett's *post-hoc* test). **f.** G protein coupling properties of optosNPFR<sup>V1</sup> after activation with light (1 s, 525 nm, 720 $\mu\text{W}/\text{cm}^2$ ). Maximum normalized responses are shown as relative light units (RLU, n=6 independent experiments, n.s.  $p>0.05$ , one-way ANOVA with Dunnett's *post-hoc* test). **g.** G protein coupling properties of optoTk99D<sup>V1</sup> after activation with light (1 s, 525 nm, 720 $\mu\text{W}/\text{cm}^2$ ). Maximum normalized responses are shown as relative light units (RLU, n=3 independent experiments, n.s.  $p>0.05$ , one-way ANOVA with Dunnett's *post-hoc* test). All boxplots depict 75<sup>th</sup> (top), median (central line) and 25<sup>th</sup> (bottom) percentile, whiskers depict 99<sup>th</sup> (top) and 1<sup>st</sup> (bottom) percentile. Source data and statistical details are provided as a Source Data file.

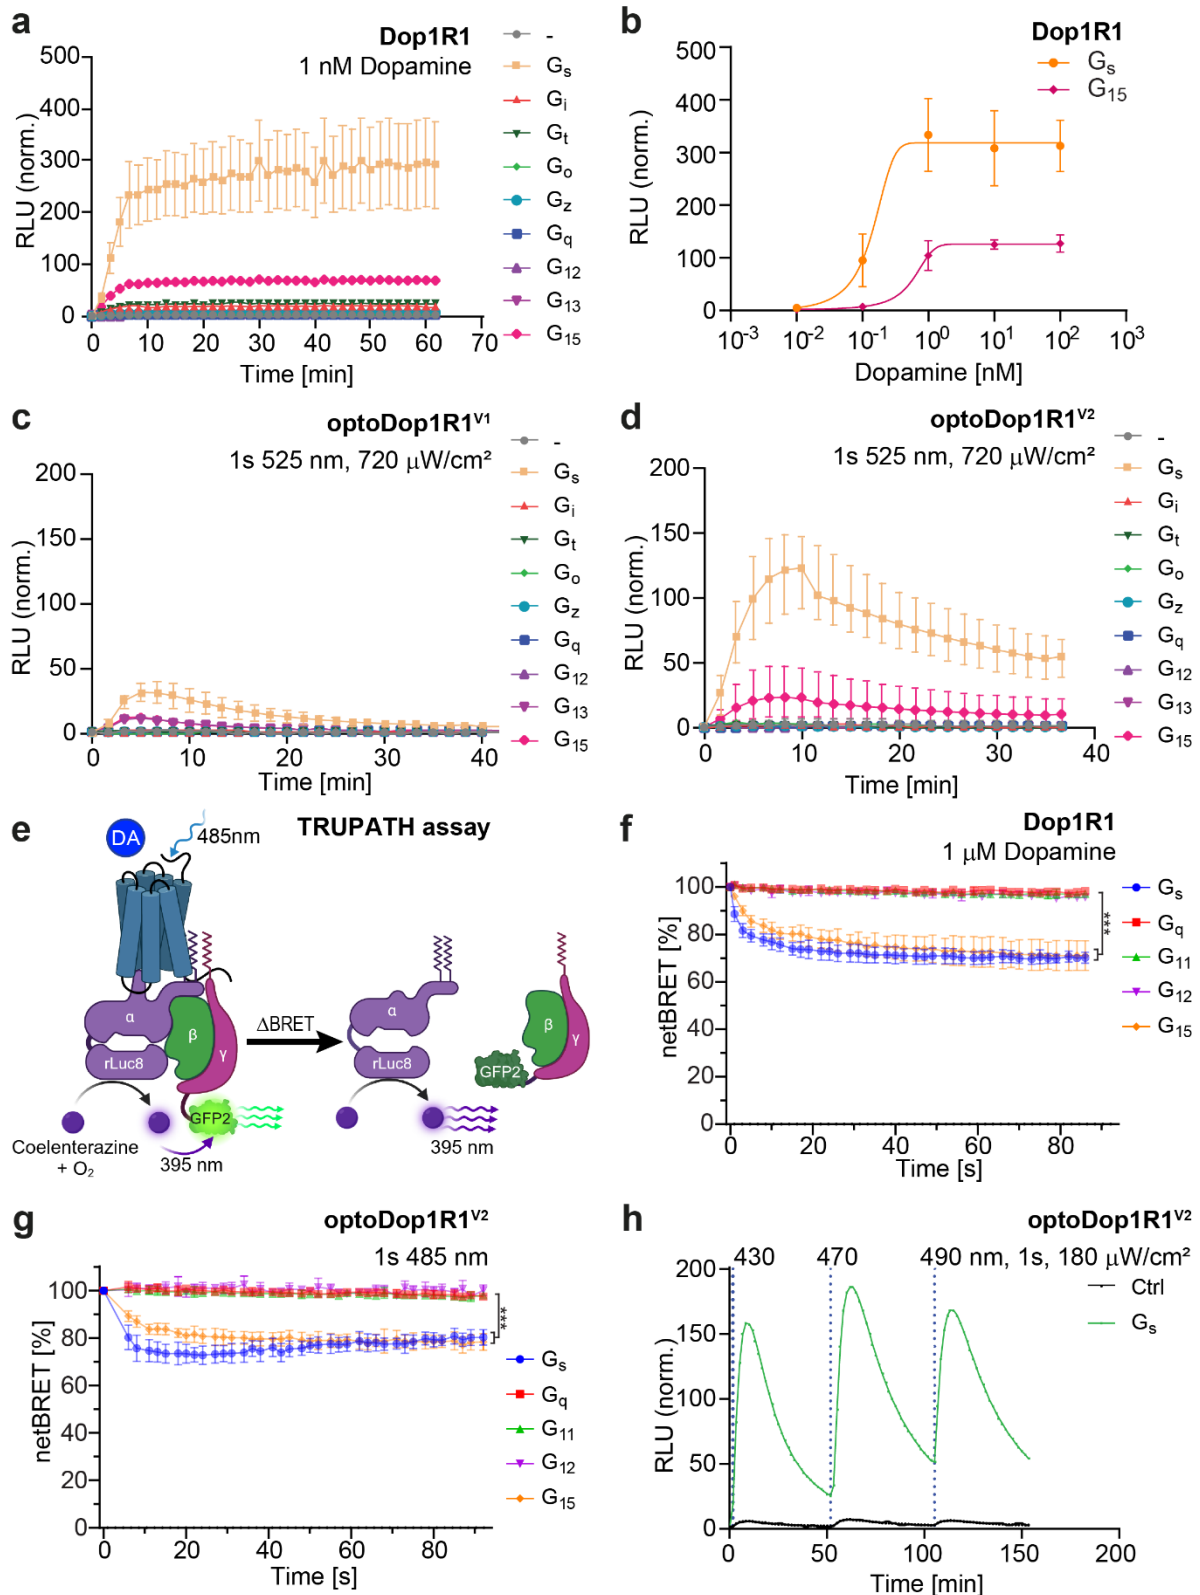

**Supplementary Figure 2. Validation of optoDop1R1<sup>V2</sup> function in  $G_{sx}$  and TRUPATH assays.**

**a-d.** G protein coupling properties of *Drosophila* Dop1R1 and optoDop1R1 in the  $G_{sx}$  assay (shown as relative light units (RLU)). **a.** G protein coupling responses over time of *Drosophila* Dop1R1 with 1 nM DA (mean  $\pm$  SEM, n=4 independent experiments). **b.** DA concentration dependent maximum activation of  $G_s$  and  $G_{15}$  signaling of Dop1R1 (n=4 independent experiments). **c.** G protein coupling of optoDop1R1<sup>V1</sup> after activation with light (1 s, 525 nm, 720  $\mu$ W/cm<sup>2</sup>). Normalized response kinetics are shown as relative light units (RLU, mean  $\pm$

SEM, n=7 independent experiments). **d.** G protein coupling properties of improved optoDop1R1<sup>V2</sup> after activation with light (1s 525 nm, 720  $\mu\text{W}/\text{cm}^2$ ). Normalized response kinetics are shown as relative light units (RLU, mean  $\pm$  SEM, n=7 independent experiments). **e.** Schematic of the TRUPATH assay. Bioluminescence resonance energy transfer (BRET) between G $\alpha$  subunits fused to RLuc8 and G $\gamma$  subunits fused to GFP2 is diminished upon receptor activation and G protein subunit dissociation, resulting in lower BRET efficiency. Changes in the BRET emission ratio (netBRET: 515 nm/410 nm) represent G protein activation kinetics. Created with BioRender.com. **f.** Kinetic G protein coupling properties of *Drosophila* Dop1R1 after activation with 1 $\mu\text{M}$  DA assayed using TRUPATH (mean  $\pm$  SEM, n=3 independent experiments, \*\*\*p<0.001, one-way ANOVA with Dunnett's *post-hoc* test). **g.** G protein coupling properties of optoDop1R1<sup>V2</sup> after activation with light (1 s, 485 nm) using the TRUPATH assay. Normalized response kinetics are shown (mean  $\pm$  SEM, n=4 independent experiments, \*\*\*p<0.001, one-way ANOVA with Dunnett's *post-hoc* test). **h.** Mean response of wavelength-dependent induction of G $\beta\gamma$ -mediated cAMP production after optoDop1R1<sup>V2</sup> activation with light (1 s, 180  $\mu\text{W}/\text{cm}^2$ , 430-490 nm, n=3 independent experiments). All boxplots depict 75<sup>th</sup> (top), median (central line) and 25<sup>th</sup> (bottom) percentile, whiskers depict 99<sup>th</sup> (top) and 1<sup>st</sup> (bottom) percentile. Source data and statistical details are provided as a Source Data file.

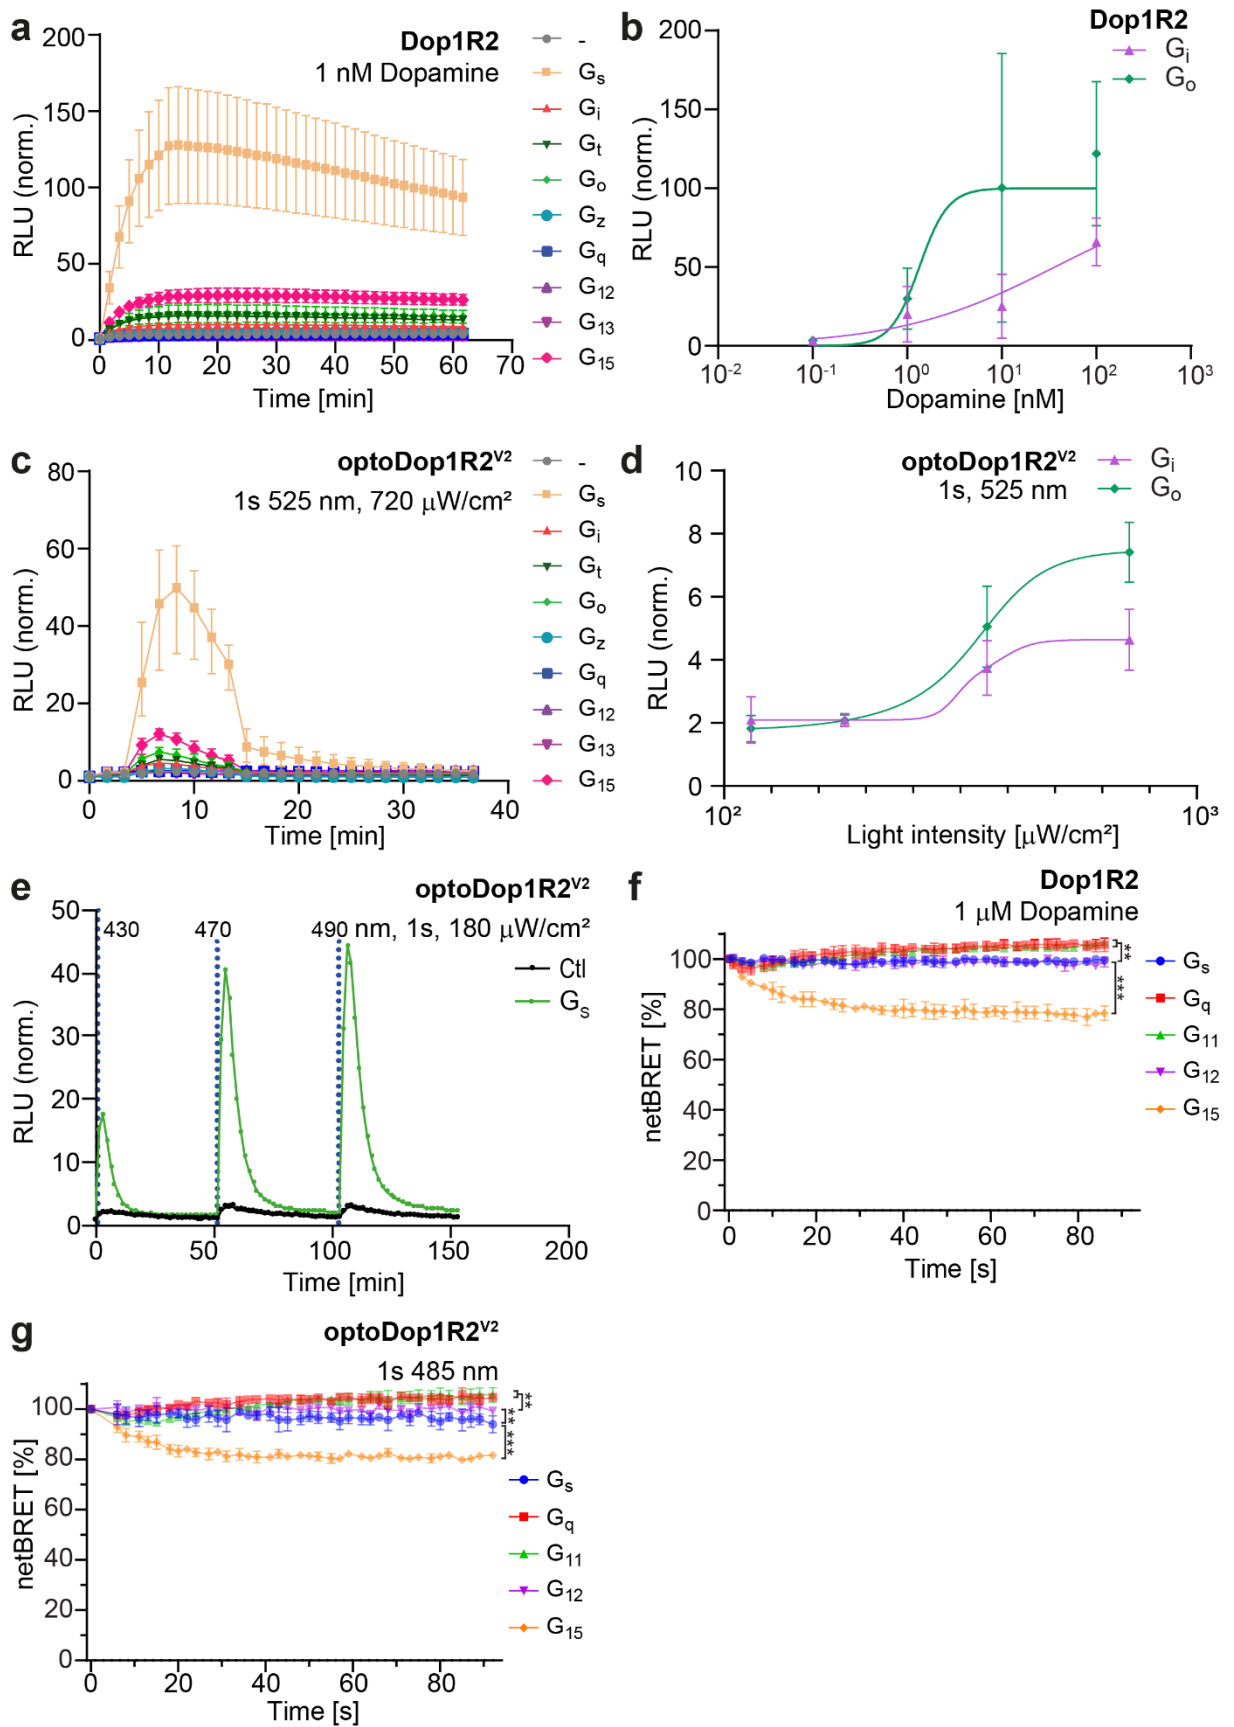

**Supplementary Figure 3. Validation of optoDop1R2<sup>V2</sup> function in  $G_{sx}$  and TRUPATH assays.**

**a-e.** G protein coupling properties of *Drosophila* Dop1R2 and optoDop1R2<sup>V2</sup> in the  $G_{sx}$  assay (shown as relative light units (RLU)). **a.** G protein coupling responses over time of *Drosophila*

Dop1R2 with 1nM DA (mean  $\pm$  SEM, n=4 independent experiments). **b.** DA concentration dependent maximum activation of G<sub>i</sub> and G<sub>o</sub> signaling of Dop1R2 (mean  $\pm$  SEM, 0.1/10 nM: n=3 independent experiments; 1.0/100 nM: n=4 independent experiments). **c.** G protein coupling responses over time of optoDop1R2<sup>V2</sup> after activation with light (1s 525 nm, 720  $\mu$ W/cm<sup>2</sup>). Normalized response kinetics are shown (mean  $\pm$  SEM, n=4 independent experiments). **d.** Light intensity-dependent maximum of G<sub>i</sub> and G<sub>o</sub> signaling induced by optoDop1R2<sup>V2</sup> (1 s, 525 nm, n=4 independent experiments). **e.** Wavelength-dependent induction of G<sub>s</sub>-mediated cAMP production after optoDop1R2<sup>V2</sup> activation with light (1s 180  $\mu$ W/cm<sup>2</sup>, 430-490 nm, n=3 independent experiments). **f.** Kinetic G protein coupling properties of wild type Dop1R2 after activation with 1 $\mu$ M DA assayed with TRUPATH (mean  $\pm$  SEM, n=3 independent experiments, one-way ANOVA with Dunnett's *post-hoc* test). **g.** G protein coupling properties of optoDop1R2<sup>V2</sup> after activation with light (1 s, 485 nm) using TRUPATH. Normalized response kinetics are shown (mean  $\pm$  SEM, n=4 independent experiments, one-way ANOVA with Dunnett's *post-hoc* test). All boxplots depict 75<sup>th</sup> (top), median (central line) and 25<sup>th</sup> (bottom) percentile, whiskers depict 99<sup>th</sup> (top) and 1<sup>st</sup> (bottom) percentile. Source data and statistical details are provided as a Source Data file.

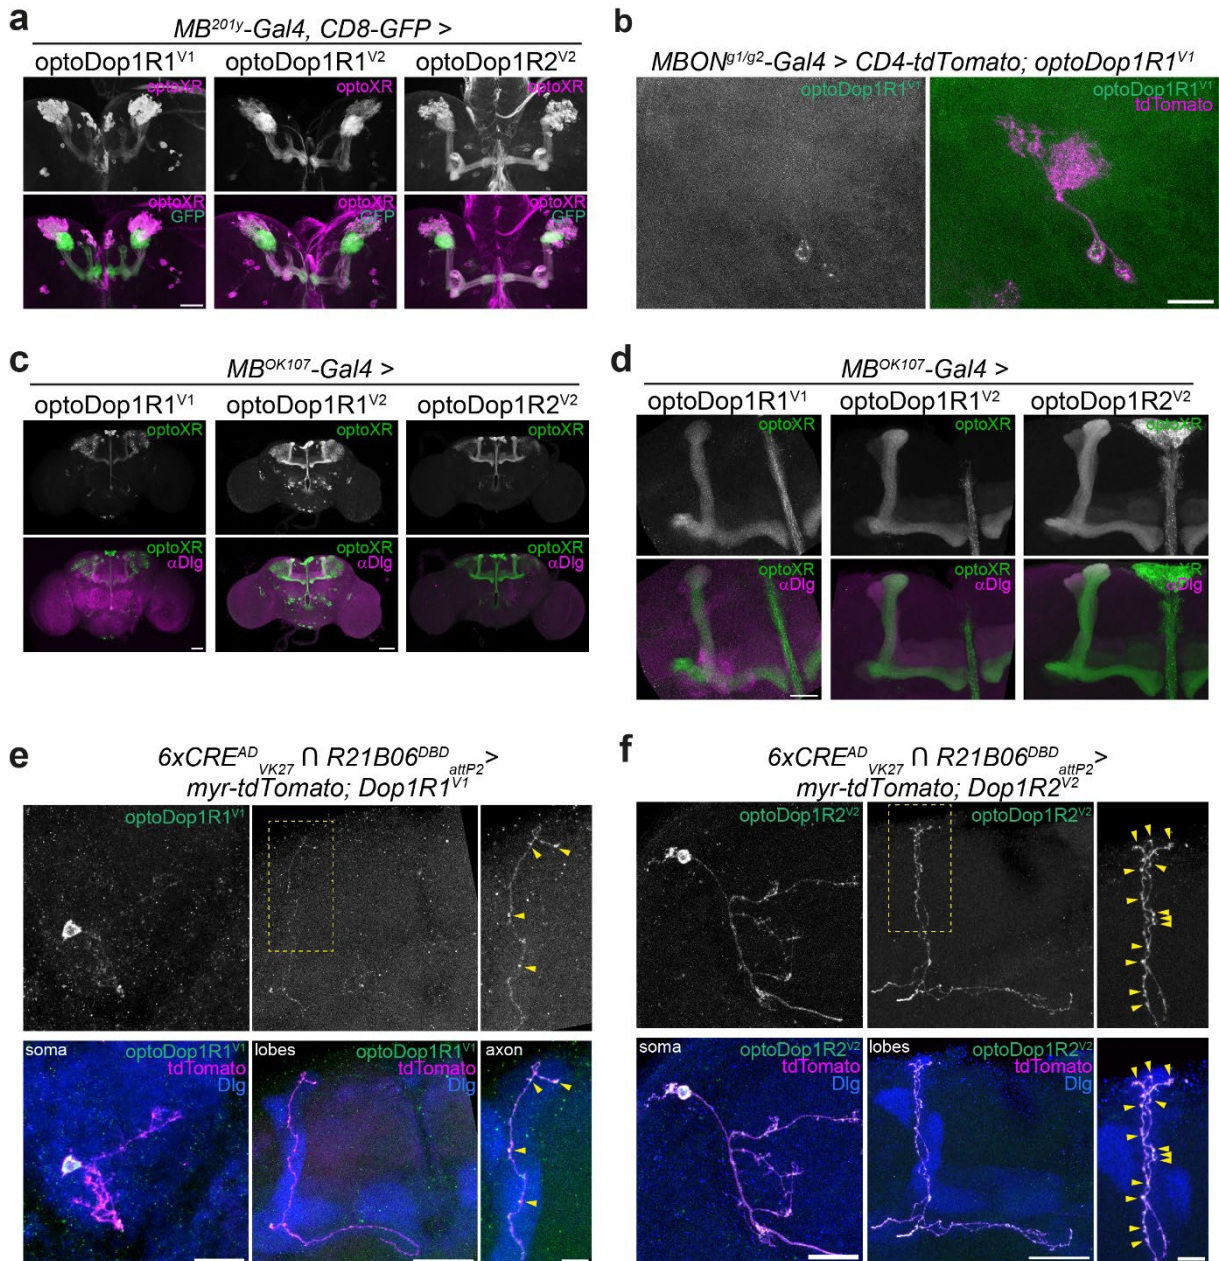

**Supplementary Figure 4. *In vivo* localization of optoDopRs.**

**a.** Overview of immunolabeled optoDopR expression in the larval mushroom body (*201y-Gal4*, *CD8-GFP*, scale bars: 50  $\mu$ m). **b.** Single cell expression of immunolabeled optoDop1R1<sup>V1</sup> in larval MBONs co-labeled with membrane bound CD4-tdTomato (*MBON<sup>g1/g2</sup>-Gal4*, *CD4-tdTomato*). Scale bar 20  $\mu$ m. Expression was mostly detected in the soma, with low expression in the axon and dendrites. **c.** Immunolabeling of optoDopRs in the adult mushroom body (all KCs, *OK107-Gal4*, *myr-tdTomato*) co-labeled with anti-Dlg marking the MB (scale bars: 50  $\mu$ m). **d.** Enlarged view of optoDopR expression in the adult mushroom body (all KCs, *OK107-Gal4*, *myr-tdTomato*) co-labeled with anti-Dlg marking the MB (scale bars: 25  $\mu$ m). **e.** Single cell immunolabeling of optoDop1R1<sup>V1</sup> expressed in an adult mushroom body KC together with membrane-bound tdTomato and Dlg outlining the MB (scale bar: 10, 20, 5  $\mu$ m). Prominent labeling is only seen in the KC soma with low dendritic and axonal signal. Arrowheads indicate axonal varicosities. **f.** Single cell expression of optoDop1R2<sup>V2</sup> in the adult mushroom body showing a KC labeled with membrane bound tdTomato and immunostained for opto Dop1R2<sup>V2</sup> and Dlg outlining the MB (scale bar: 10, 20, 5  $\mu$ m). Prominent axonal and somatodendritic



localization can be detected, with arrowheads indicating axonal varicosities. All panels show representative images from at least two independent experiments with multiple samples.

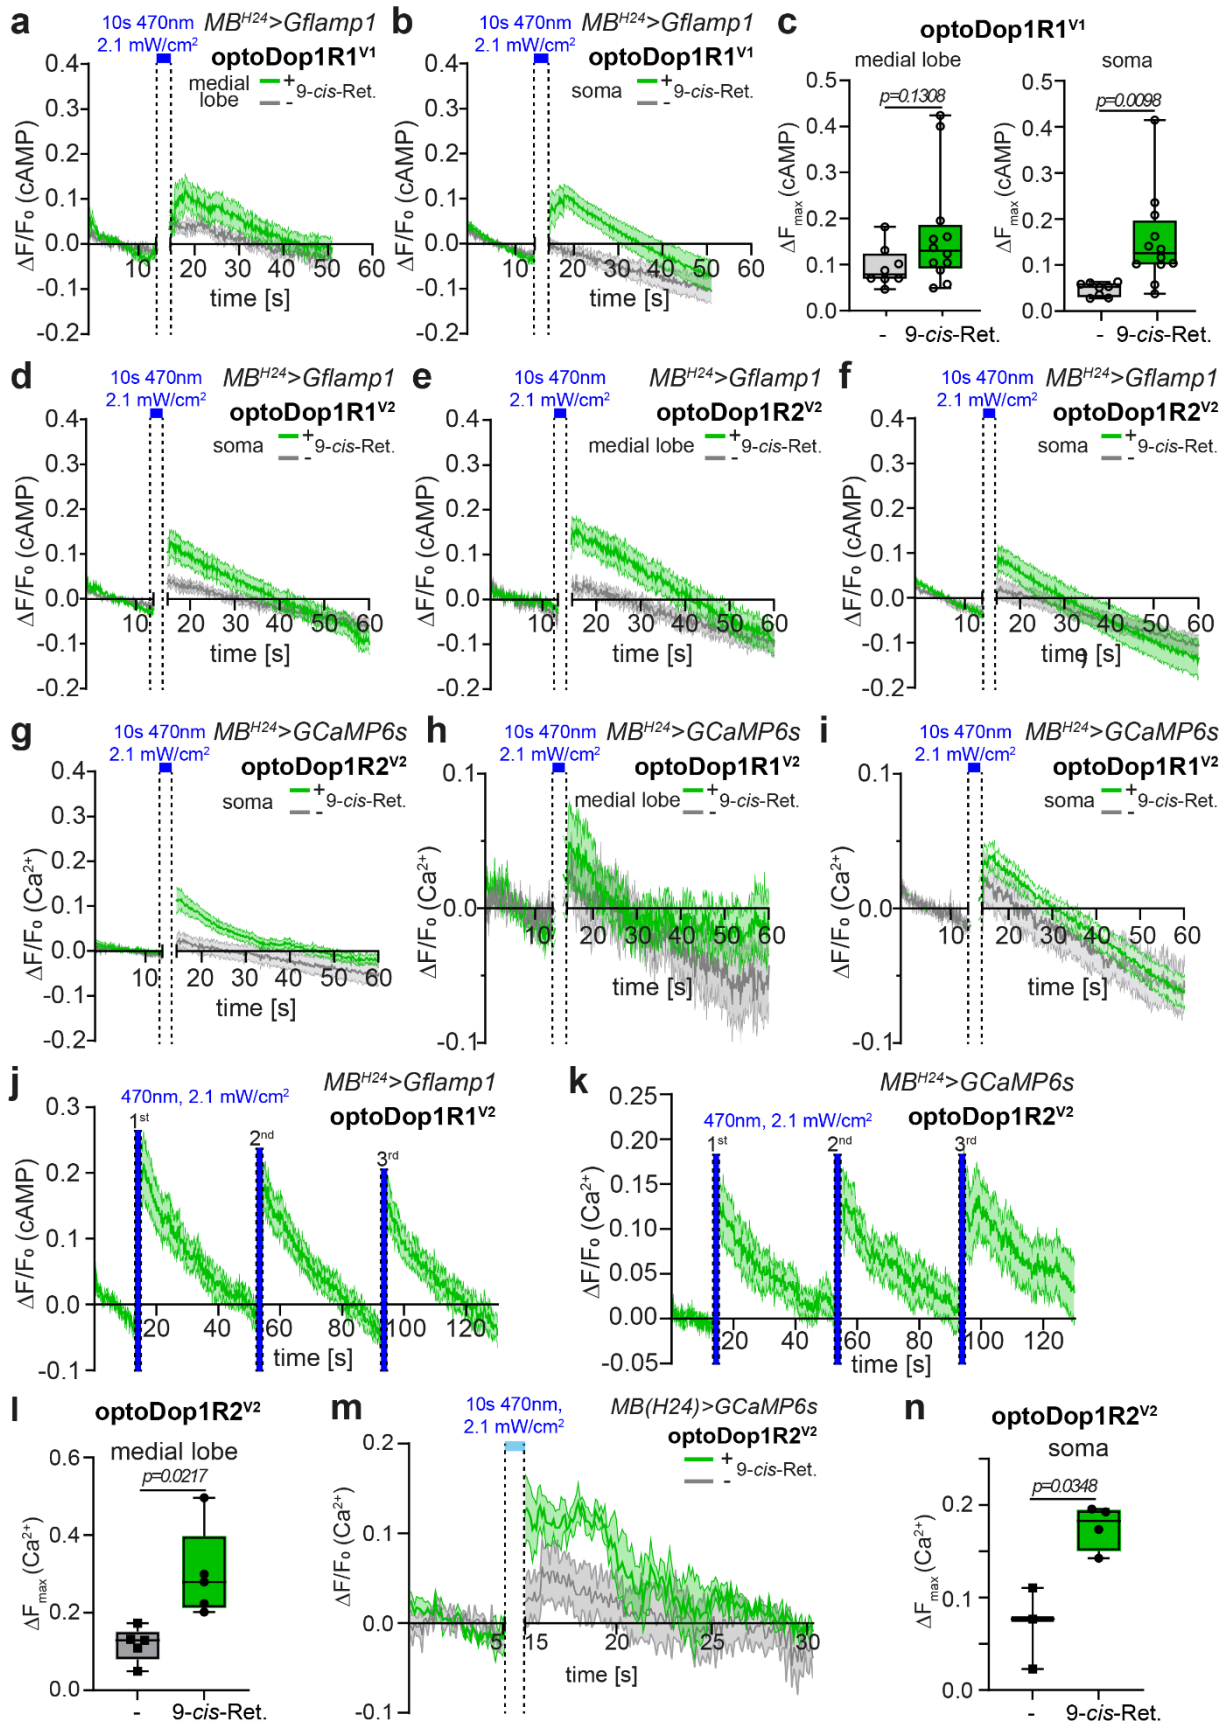

**Supplementary Figure 5. *In vivo* validation of optoDopR activity.**

**a-c.** cAMP imaging in the larval mushroom body using *Gflamp1* and *optoDop1R1<sup>V1</sup>* expression with and without 9-*cis*-Retinal feeding. Responses in the medial lobe (**a**) and soma (**b**) after 10s blue light illumination are shown over time. Maximum cAMP responses in the medial lobe

and soma (**c**) after optoDop1R1<sup>V1</sup> activation (n=8,12 biologically independent samples, two-tailed unpaired Student's *t*-test). **d.** cAMP imaging in the larval mushroom body using Gflamp1 and optoDop1R1<sup>V2</sup> expression (*H24-Gal4>G-Flamp1, optoDop1R1<sup>V2</sup>*, 10s 470 nm, n=11, 15). Responses in the soma after 10s blue light illumination are shown over time. **e-f.** cAMP imaging in the larval mushroom body using Gflamp1 and optoDop1R2<sup>V2</sup> expression with and without 9-*cis*-Retinal feeding (10s 470 nm, n=7,8 biologically independent samples). Responses in the medial lobe (**e**) and soma (**f**) after 10s blue light illumination are shown over time. **g-i.** Calcium imaging in the mushroom body using GCaMP6s and optoDop1R2<sup>V2</sup> or optoDop1R1<sup>V2</sup> expression in isolated larval brains (10s 470 nm, optoDop1R2<sup>V2</sup>: n=11,7 biologically independent samples; optoDop1R1<sup>V2</sup>: n=8,8 biologically independent samples). Responses in the soma upon optoDop1R2<sup>V2</sup> activation (**g**), and for optoDop1R1<sup>V2</sup> activation in the medial lobe (**h**) and soma (**i**) are shown over time. **j-k.** cAMP or calcium imaging in the larval mushroom body in isolated brains with repeated light activation of optoDopRs (each light pulse: 10 s, 470 nm). Medial lobe cAMP responses upon optoDop1R1<sup>V2</sup> activation (n=10 biologically independent samples) (**j**) and calcium responses upon optoDop1R2<sup>V2</sup> activation (n=6 biologically independent samples) (**k**) are shown over time. **l-n.** *In vivo* calcium imaging in intact larvae using GCaMP6s and optoDop1R2<sup>V2</sup> expressed in the larval mushroom body (*H24-Gal4>GCaMP6s, optoDop1R2<sup>V2</sup>*). Maximum calcium responses in the MB medial lobe after light-induced activation of optoDop1R2<sup>V2</sup> with or without 9-*cis*-retinal feeding (10s 470 nm, n=5,5 animals, two-tailed unpaired Student's *t*-test) (**l**). Calcium responses in KC somata with or without 9-*cis*-retinal over time (**m**) and maximum responses (**n**) after light-induced activation of optoDop1R2<sup>V2</sup> (10s 470 nm, n=3, 4 animals, two-tailed unpaired Student's *t*-test).

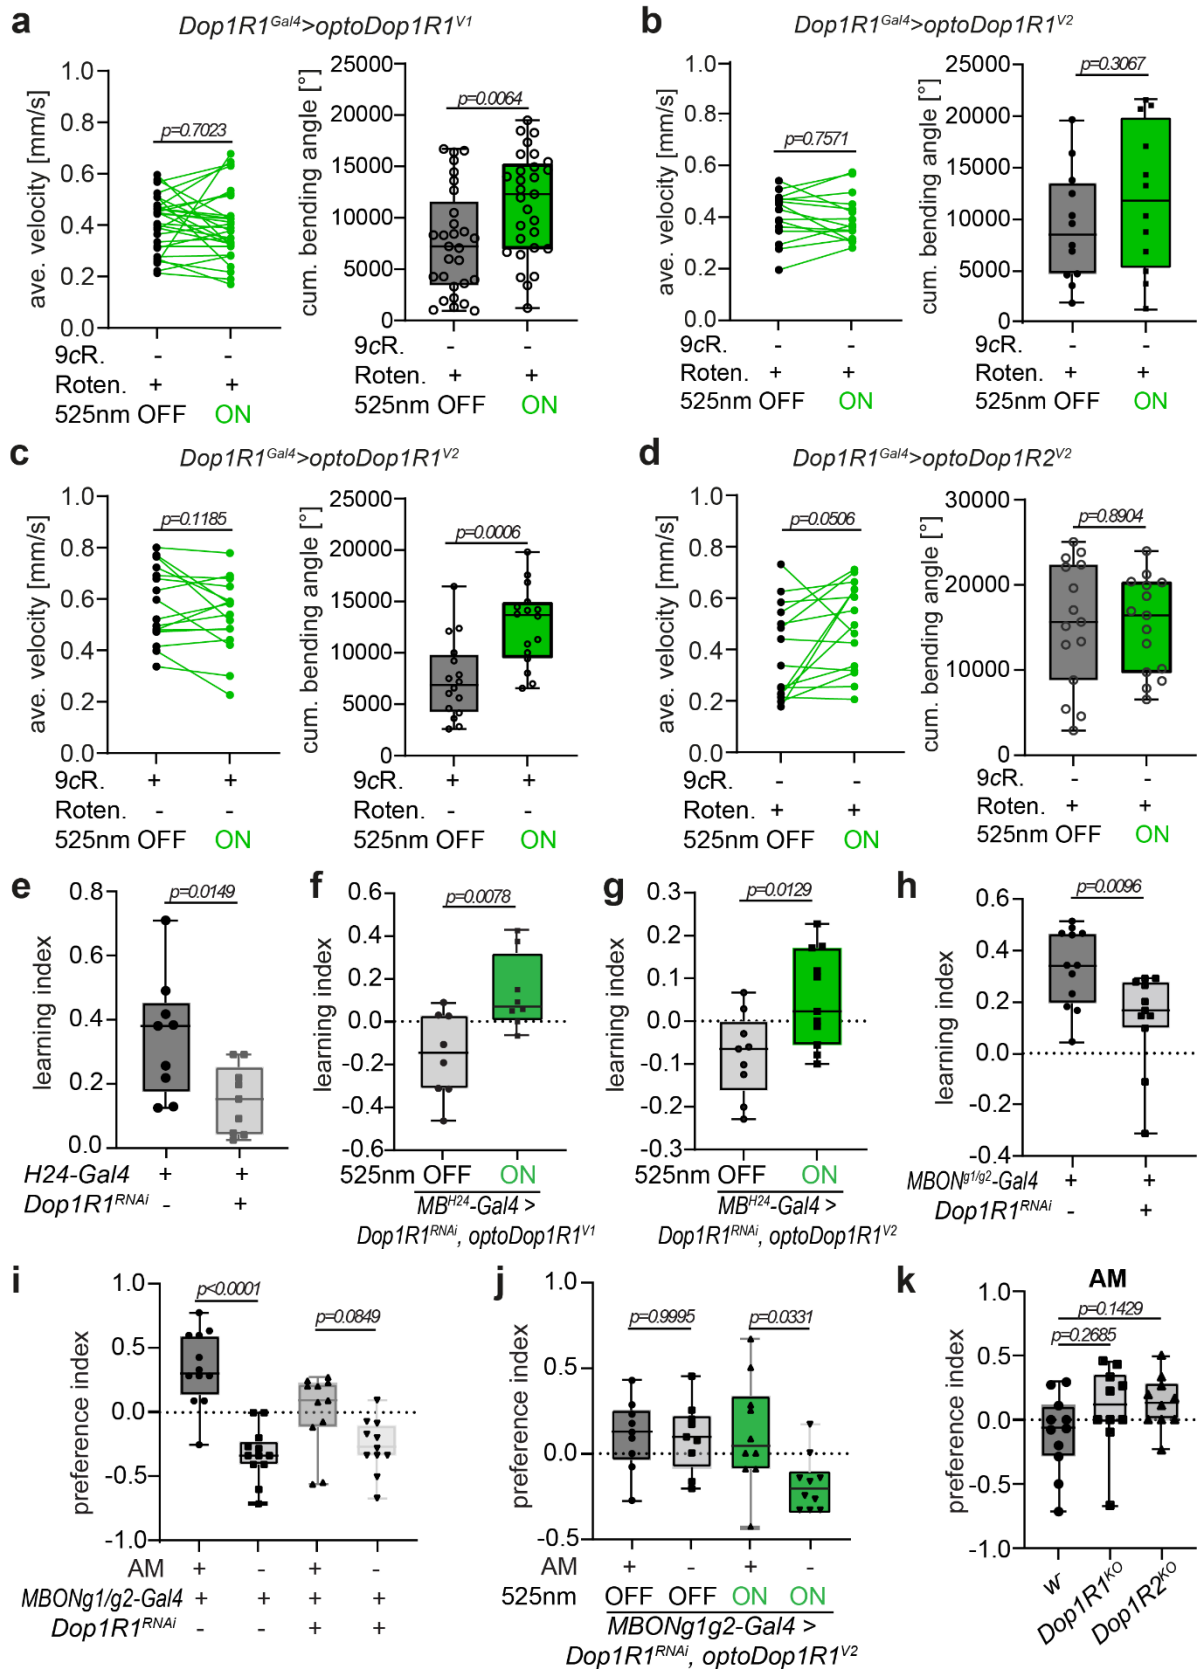

**Supplementary Figure 6. Functional validation of optoDopRs in *Drosophila* larvae *in vivo*.**

**a-b.** Average velocity and bending angles of Rotenone-fed animals expressing optoDop1R1<sup>V1</sup>(a) or optoDop1R1<sup>V2</sup>(b) in an endogenous Dop1R1-like pattern without 9-*cis*-

Retinal feeding. Animals were tracked without light for 1min and with 525 nm light illumination for 1 min. Average velocity (left) or cumulative bending angles (right) in the dark (OFF) and during light activation (ON) are shown (optoDop1R1<sup>V1</sup>: n=29, 29 animals, optoDop1R1<sup>V2</sup>: n=12, 12 animals, two-tailed paired Student's *t*-test). **c.** Average velocity and bending angles of 9-*cis*-Retinal fed larvae without Rotenone treatment expressing optoDop1R1<sup>V2</sup> in an endogenous Dop1R1-like pattern. Larvae were tracked without light for 1min and with 525 nm light illumination for 1 min. Average velocity (left) or cumulative bending angles (right) in the dark and during light activation are shown (n=16, 16, \*\* p<0.01, paired Student's *t*-test). **d.** Average velocity and bending angles of Rotenone-fed animals expressing optoDop1R2<sup>V2</sup> in an endogenous Dop1R1-like pattern without 9-*cis*-Retinal feeding. Larvae were tracked without light for 1min and with 525 nm light illumination for 1 min. Average velocity (left) or cumulative bending angles (right) in the dark and during light activation are shown (n=15, 15, n.s. p>0.05, two-tailed paired Student's *t*-test). **e.** Larval learning after fructose-odor training is impaired upon Dop1R1<sup>RNAi</sup> expression in the MB (n=9, 9 independent experiments, two-tailed unpaired Student's *t*-test). **f.** Dop1R1-dependent single odor-fructose learning in larvae. Animals expressing optoDop1R1<sup>V1</sup> and Dop1R1<sup>RNAi</sup> in KCs were trained using fructose-odor learning (3x3min) with or without light activation during fructose exposure (3 min 525 nm, 720  $\mu$ W/cm<sup>2</sup>). Learning index of 9-*cis*-Retinal fed animals with and without light activation during training is shown (n=8, 8 independent experiments, unpaired two-tailed Student's *t*-test). **g.** Single odor-fructose learning in larvae expressing optoDop1R1<sup>V2</sup> and Dop1R1<sup>RNAi</sup> in KCs. Fructose-odor learning (3x3min) with or without light activation during fructose exposure (3 min 525 nm, 720  $\mu$ W/cm<sup>2</sup>). Learning index of 9-*cis*-retinal fed animals with and without light activation during training is shown (n=9, 11 independent experiments, two-tailed unpaired Student's *t*-test). **h.** Larval learning after fructose-odor training is impaired upon Dop1R1<sup>RNAi</sup> expression in MBON<sup>g1/g2</sup> (n=12, 11 independent experiments, two-tailed unpaired Student's *t*-test). **i.** Fructose reward-dependent induction of odor preference (AM or blank) for Dop1R1-dependent data from (h) (n=12, 11 independent experiments, One-way ANOVA with Tukey's *post-hoc* test). **j.** Fructose and optoDop1R1<sup>V2</sup>-dependent induction of odor preference (amylacetate (AM) or blank) with (green bars) or without (gray bars) light illumination during fructose pairing in Dop1R1<sup>RNAi</sup> larvae (n=9, 9 independent experiments, One-way ANOVA with Tukey's *post-hoc* test, data from Fig. 5e). **k.** Innate preference index for AM in control (*w*), *Dop1R1*<sup>KO</sup> and *Dop1R2*<sup>KO</sup> 3<sup>rd</sup> instar larvae (n=11, 10, 9 independent experiments, One-way ANOVA with Tukey's *post-hoc* test). All boxplots depict 75<sup>th</sup> (top), median (central line) and 25<sup>th</sup> (bottom) percentile, whiskers depict 99<sup>th</sup> (top) and 1<sup>st</sup> (bottom) percentile. Source data and statistical details are provided as a Source Data file.

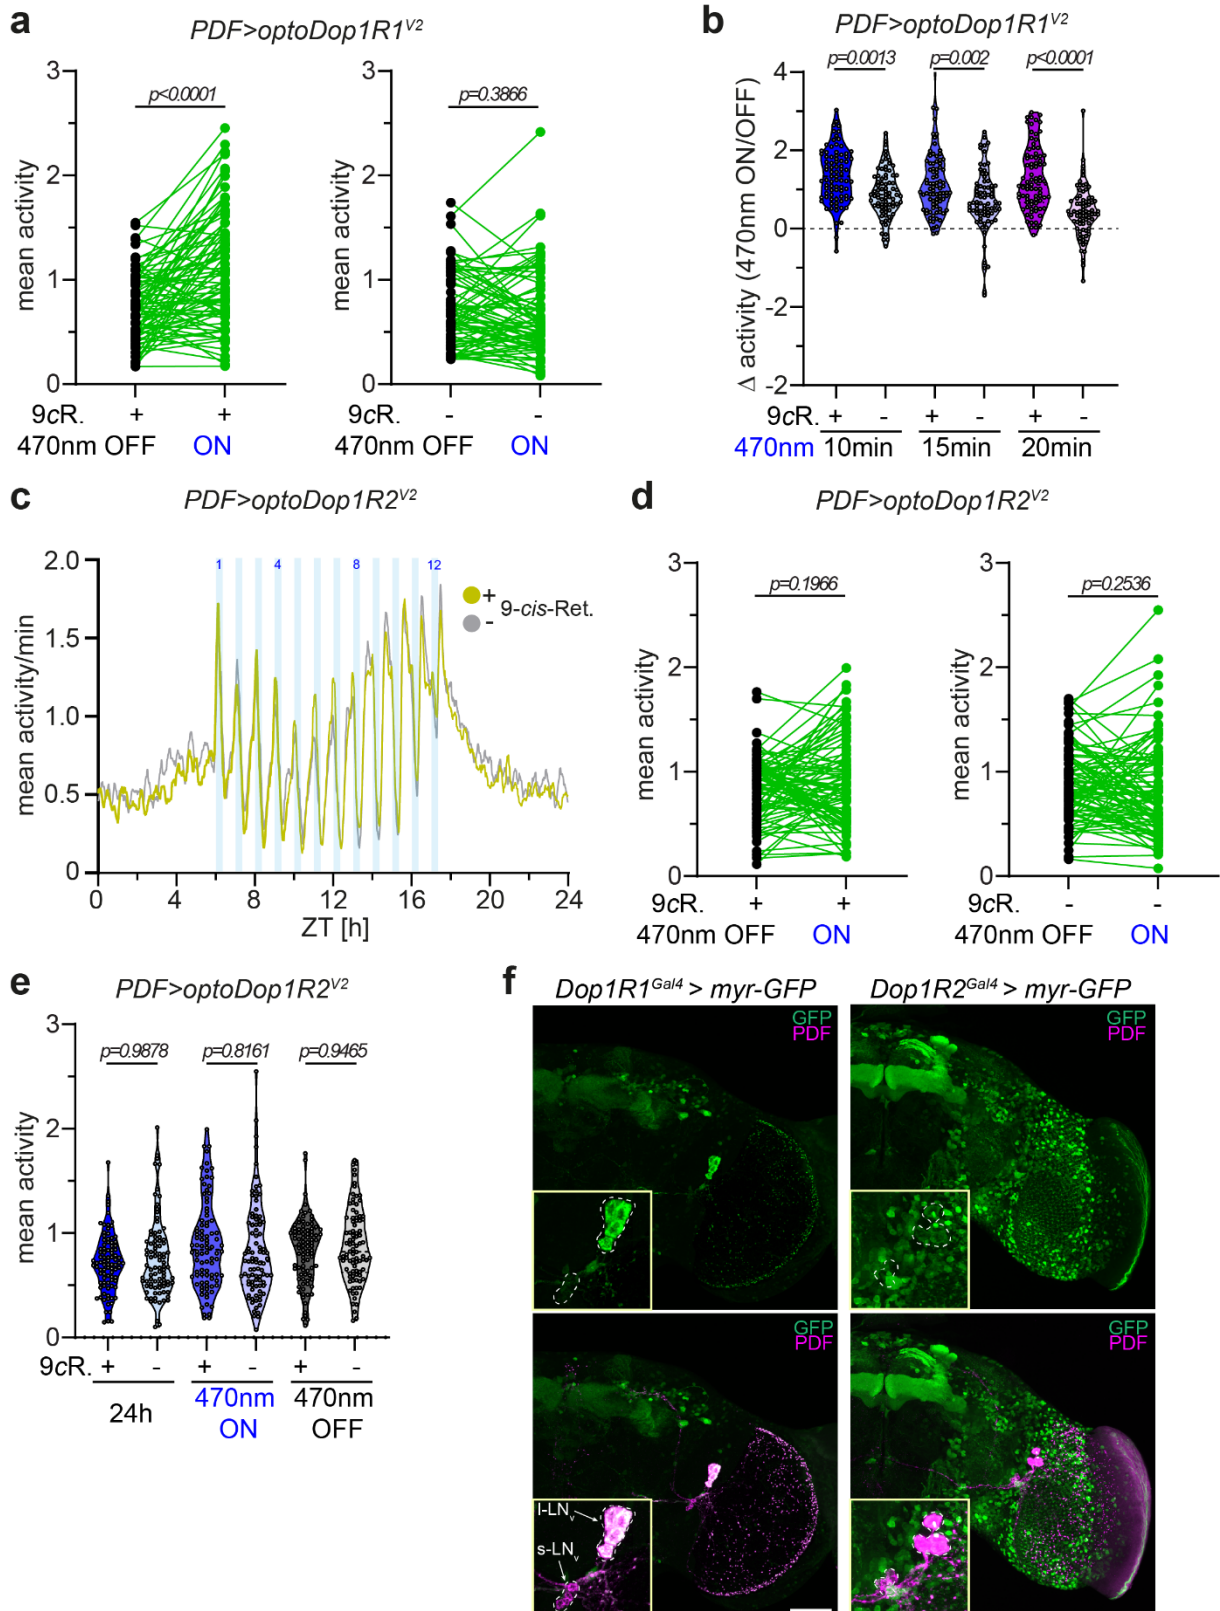

**Supplementary Figure 7. Cell type-specific function of Dop1R1 activity in blue light induced arousal.**

**a.** Activity difference of flies expressing optoDop1R1<sup>V2</sup> in PDF neurons with (left) and without 9-*cis*-Retinal (9cR) feeding (right) before and during blue light pulse exposure (24h activity data from Fig. 6g,  $n=83,77$  animals, two-tailed paired *t*-test). **b.** Activity difference of flies expressing optoDop1R1<sup>V2</sup> in PDF neurons (with and without 9-*cis*-Retinal feeding) during light on times using different duration of blue light pulse exposure (1/h, 10, 15 or 20min,

n=83,77 animals, one-way ANOVA with Tukey's *post-hoc* test). **c.** Mean activity during 24h monitoring in flies expressing *optoDop1R2<sup>V2</sup>* in *pdf* neurons with and without 9cR feeding (n=90 animals). Blue light pulses (12x 20min, 1/h) during daytime increase fly activity independently of *optoDop1R1<sup>V2</sup>* activation. **d.** Activity difference of flies expressing *optoDop1R2<sup>V2</sup>* in PDF neurons with (left) and without 9-*cis*-Retinal (9cR) feeding (right) before and during blue light pulse exposure (24h activity data from Fig. S6e, (n=90 animals, two-tailed paired *t*-test). **e.** Mean activity of *pdf>optoDop1R2<sup>V2</sup>*-expressing flies during the entire 24h, all light on and light off phases (n=90 animals, one-way ANOVA with Tukey's *post-hoc* test). **f.** myristoylated (myr-)GFP reporter expression using *Dop1R1* (left panel) or *Dop1R2* (right panel) knock-in Gal4 lines together with immunolabeling of PDF-expressing s-LN<sub>v</sub>s and l-LN<sub>v</sub>s (somata are indicated by dotted lines). Note that *Dop1R1* reporter expression is specific for l-LN<sub>v</sub>s, while *Dop1R2* reporter expression is weak in all LN<sub>v</sub>s. Scale bar: 50μm, inset 10μm. All violin plots with single data points depict data distribution, dotted lines depict 75<sup>th</sup> (top) and 25<sup>th</sup> (bottom) percentile, solid central line the median. Source data and statistical details are provided as a Source Data file.

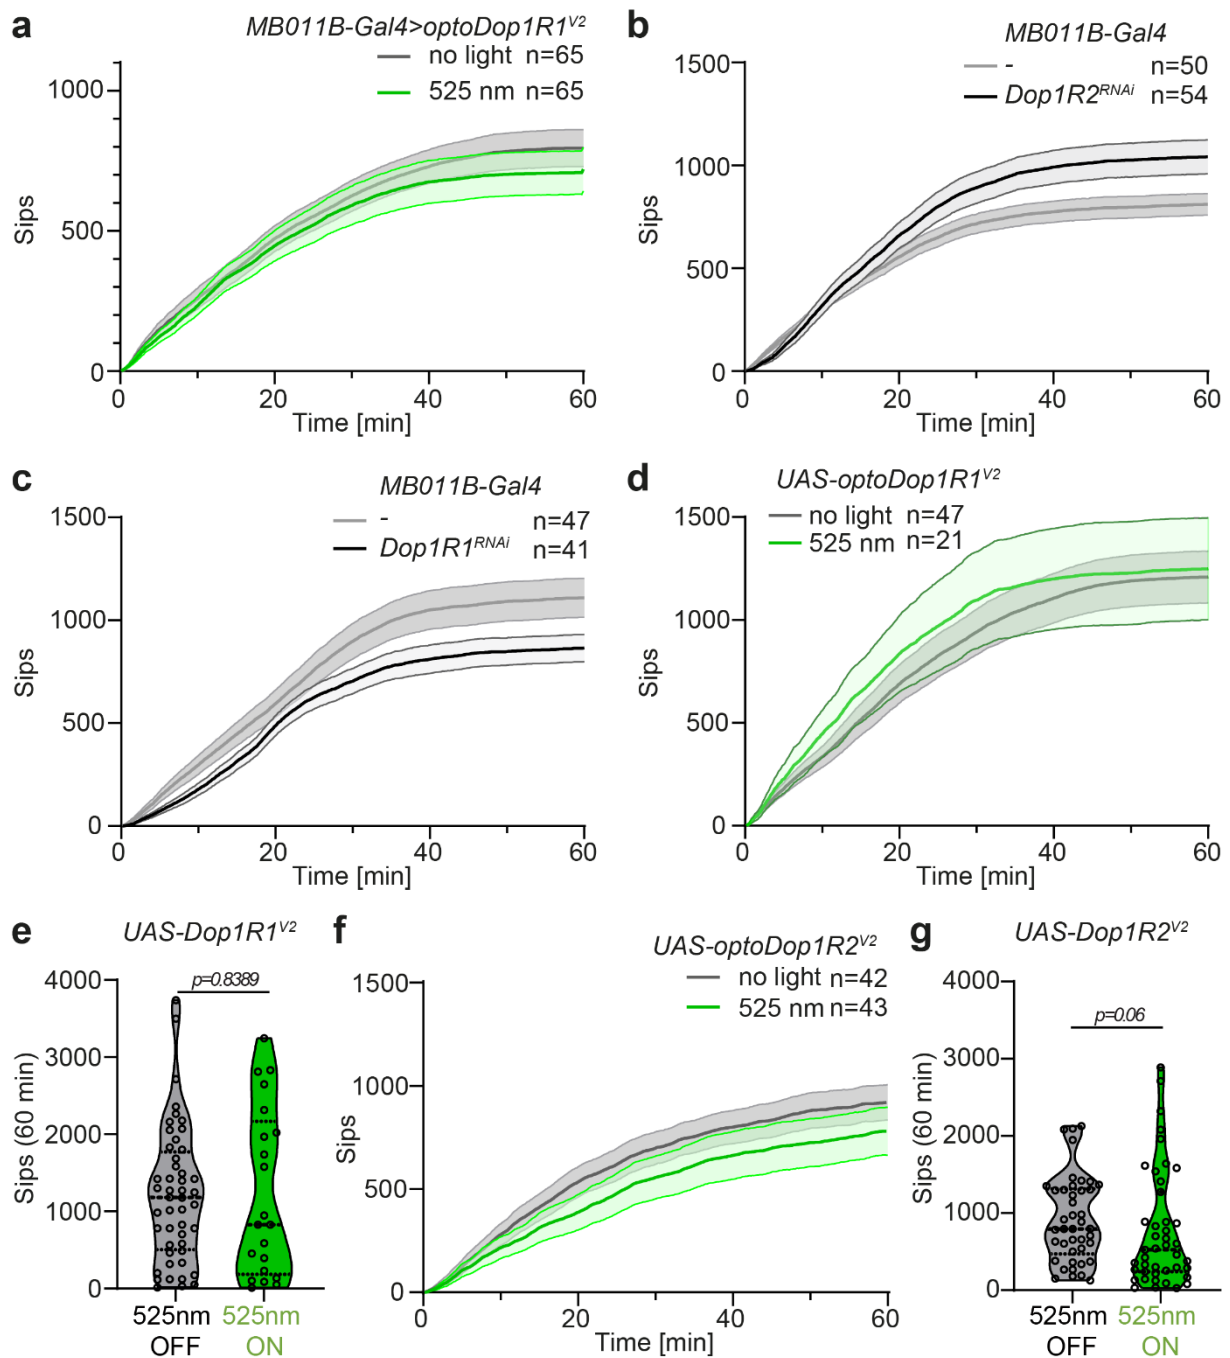

**Supplementary Figure 8: Cell type-specific function of Dop1R2 activity in satiety.**

**a.** Cumulative sips over time in flies expressing optoDop1R1<sup>V2</sup> with *MB011B-Gal4* with or without light stimulation (mean ± SEM, n=65,65 animals). **b.** Cumulative sips over time in flies expressing *Dop1R2<sup>RNAi</sup>* with *MB011B-Gal4* compared to control (mean ± SEM, n=50,54 animals). **c.** Cumulative sips over time in flies expressing *Dop1R1<sup>RNAi</sup>* with *MB011B-Gal4* (mean ± SEM, n=47,41 animals). **d.** Cumulative sips over time in optoDop1R1<sup>V2</sup> transgenes without Gal4 expression and without or with light stimulation (mean ± SEM, n=48,21 animals). **e.** Total sips at 60min for optoDop1R1<sup>V2</sup> transgenes without Gal4 expression and without or with light stimulation (n=48,21 animals, two-tailed Mann-Whitney test). **f.** Cumulative sips over time in optoDop1R2<sup>V2</sup> transgenes without Gal4 expression and without or with light stimulation (mean ± SEM, n=42,43 animals). **g.** Total sips at 60min for optoDop1R2<sup>V2</sup> transgenes without Gal4 expression and without or with light stimulation (n=42,43 animals, two-tailed Mann-Whitney test). All violin plots with single data points depict



data distribution, dotted lines depict 75<sup>th</sup> (top) and 25<sup>th</sup> (bottom) percentile, solid central line the median. Source data and statistical details are provided as a Source Data file.

**Supplementary Table 1. Previous optoXRs and their *in vivo* applications.** Only optoXRs that have been applied *in vivo* are listed here. Abbreviations: Rho: bovine Rhodopsin, OPN4: melanopsin

| Chimeric receptor       | Original reference | <i>In vivo</i> applications                                                                                                                                                                                                                                                                                                                                                                    | Cell type-specificity/rescue of endogenous receptor function     |
|-------------------------|--------------------|------------------------------------------------------------------------------------------------------------------------------------------------------------------------------------------------------------------------------------------------------------------------------------------------------------------------------------------------------------------------------------------------|------------------------------------------------------------------|
| Rho:β <sub>2</sub> AR   | 1                  | -virus-mediated overexpression in mouse N. accumbens neurons <sup>2</sup><br>-virus-mediated overexpression in mouse basolateral amygdala, promoting anxiety-like behavior <sup>3,4</sup>                                                                                                                                                                                                      | partial/no<br>partial/no                                         |
| Rho:α <sub>1</sub> AR   | 2                  | -virus-mediated overexpression in mouse N. accumbens neurons, reward-related preference behavior<br>-virus-mediated overexpression in mouse CA1 astrocytes, memory acquisition <sup>5</sup><br>-transgenic overexpression in mouse cortical astrocytes, remote memory acquisition <sup>6</sup><br>-virus-mediated overexpression in mouse astrocytes in slices, electrophysiology <sup>7</sup> | partial/no<br>partial/no<br>partial/no<br>partial/no             |
| Rho:μOR                 | 8                  | -virus-mediated overexpression in mouse dorsal root ganglion neurons, preference/aversion behavior <sup>9</sup><br>-Penk-Cre dependent virus-mediated overexpression in dorsal raphe nucleus subset neurons, restoration of consumption behavior <sup>10</sup>                                                                                                                                 | partial/no<br>yes/yes                                            |
| Rho:DRD1                | 11                 | -DRD1-Cre dependent virus-mediated overexpression in mouse N. accumbens; activation of medium spiny neurons to increase social interaction                                                                                                                                                                                                                                                     | yes/no                                                           |
| Rho:CXCR4               | 12                 | -virus-mediated overexpression in mouse, T-cell recruitment                                                                                                                                                                                                                                                                                                                                    | yes/no                                                           |
| Rho:A <sub>2A</sub> AR  | 13                 | -virus-mediated overexpression in mouse hippocampus and N. accumbens, spatial memory performance and locomotor activity<br>-adora2a-cre dependent virus-mediated overexpression in mouse striatopallidal neurons, goal-directed behavior <sup>14</sup>                                                                                                                                         | partial/no<br>yes/no                                             |
| OPN4:mGluR <sub>6</sub> | 15                 | -virus-mediated overexpression in retinal ganglion cells, restoration of visually guided behavior<br>-virus-mediated overexpression in bipolar cells, restoration of visually guided behavior <sup>16</sup>                                                                                                                                                                                    | yes/partial (degeneration model)<br>yes/yes (degeneration model) |
| Rho:Fz7                 | 17                 | -Zebrafish mRNA injection and overexpression, mesoderm cell migration                                                                                                                                                                                                                                                                                                                          | no/yes                                                           |

Supplementary Table 2. optoXR variants generated in this study.

| GPCR source sequence                                                                                                        | Opto variant   | Protein sequence of generated optoXR chimera (Rho/target receptor residues)                                                                                                                                                                                                                                                                                                                                                                                                                                                      |
|-----------------------------------------------------------------------------------------------------------------------------|----------------|----------------------------------------------------------------------------------------------------------------------------------------------------------------------------------------------------------------------------------------------------------------------------------------------------------------------------------------------------------------------------------------------------------------------------------------------------------------------------------------------------------------------------------|
| A0A0B4KHI2.1/145-431<br>Dopamine 1-like receptor 1 isoform E<br>ECO:0000313<br>EMBL:AGB95944.1                              | Opto Dop1R1 V1 | MKTIIALSYIFCLVFAMYTDIEMNRLGKDSLMLNGTEGPNFYVFPFSNKTGVVRSPFEAPQYYLAEPWQFSMLAAYMFLIMLGFPINFLTYVVIYTERSLRRILNYILLNLAVADLFMVFGGFTTTLTYSLHGYFVFGPTGCNLEGGFFATLGGEIALWSLVVLAIERYVVVKDPLRYGRWVTRRAIMGVAFTWVMALACAAPPLVGWSRYIPEGMQCSCGIDYYTPHEETNNESFVIYMFVVHFIPLIVIFFCYGRLYCYAQKHKVSIKAVTRPGEVAEKQRYKSIRRPKNQPKKFKVRNLHHTSSPYHVSDHKAARMVIIMVIAFLICWLPYAGVAFYIFTHQGSDFGPIFMTIPAFFAKTSAVYNPVIYIMMKNQFRDAFKRILTMRNPWCCAQDVGNIHPRNSDRFITDYAAKNVVVMNSGRSSAELEQVSAITETSQVAPA                                                                   |
| A0A0B4KHI2.1/145-431<br>Dopamine 1-like receptor 1 isoform E<br>ECO:0000313<br>EMBL:AGB95944.1                              | Opto Dop1R1 V2 | MKTIIALSYIFCLVFAMYTDIEMNRLGKDSLMLNGTEGPNFYVFPFSNKTGVVRSPFEAPQYYLAEPWQFSMLAAYMFLIMLGFPINFLTYVTVQHKKLRTPLYILLNLAVADLFMVFGGFTTTLTYSLHGYFVFGPTGCNLEGGFFATLGGEIALWSLVVLAIERYVVVKDPLRYGRWVTRRAIMGVAFTWVMALACAAPPLVGWSRYIPEGMQCSCGIDYYTPHEETNNESFVIYMFVVHFIPLIVIFFCYGRLYCYAQKHKVSIKAVTRPGEVAEKQRYKSIRRPKNQPKKFKVRNLHHTSSPYHVSDHKAARMVIIMVIAFLICWLPYAGVAFYIFTHQGSDFGPIFMTIPAFFAKTSAVYNPVIYIMMKNQFRDAFKRILTMRNPWCCAQDVGNIHPRNSDRFITDYAAKNVVVMNSGRSSAELEQVSAITETSQVAPA                                                                     |
| A0A0B4KI18.1/125-474<br>Dopamine 1-like receptor 2 isoform<br>CECO:0000313<br>EMBL:AGB96452.1                               | Opto Dop1R2 V1 | MKTIIALSYIFCLVFAMYTDIEMNRLGKDSLMLNGTEGPNFYVFPFSNKTGVVRSPFEAPQYYLAEPWQFSMLAAYMFLIMLGFPINFLTYVVIRERYLHTALNYILLNLAVADLFMVFGGFTTTLTYSLHGYFVFGPTGCNLEGGFFATLGGEIALWSLVVLAIERYVVVTDPFSSYPMRMTVKAIMGVAFTWVMALACAAPPLVGWSRYIPEGMQCSCGIDYYTPHEETNNESFVIYMFVVHFIPLIVIFFCYGRIYRAAVIQTRSLKIGTKQVLMASGELQLTLRIHRGGTTRDQQNQVSGGGGGGGGGGGGGGSLSHSHSHSHHHHHNHGGGTTTSTPEEPDDEPLSALHNNGLARHRHMGKNFSLSRKLAKFAKEKKAARMVIIMVIAFLICWLPYAGVAFYIFTHQGSDFGPIFMTIPAFFAKTSAVYNPVIYIMMKNQFRRAFVRLLCMCCPRKIRRYQPTMRSKSKQCHVAAMVAASTSFGYHSVNQIDRTLMTETSQVAPA   |
| A0A0B4KI18.1/125-474<br>Dopamine 1-like receptor 2 isoform C<br>ECO:0000313<br>EMBL:AGB96452.1                              | Opto Dop1R2 V2 | MKTIIALSYIFCLVFAMYTDIEMNRLGKDSLMLNGTEGPNFYVFPFSNKTGVVRSPFEAPQYYLAEPWQFSMLAAYMFLIMLGFPINFLTYVTVQHKKLRTPLYILLNLAVADLFMVFGGFTTTLTYSLHGYFVFGPTGCNLEGGFFATLGGEIALWSLVVLAIERYVVVTDPFSSYPMRMTVKRAIMGVAFTWVMALACAAPPLVGWSRYIPEGMQCSCGIDYYTPHEETNNESFVIYMFVVHFIPLIVIFFCYGRIYRAAVIQTRSLKIGTKQVLMASGELQLTLRIHRGGTTRDQQNQVSGGGGGGGGGGGGGGSLSHSHSHSHHHHHNHGGGTTTSTPEEPDDEPLSALHNNGLARHRHRHMGKNFSLSRKLAKFAKEKKAARMVIIMVIAFLICWLPYAGVAFYIFTHQGSDFGPIFMTIPAFFAKTSAVYNPVIYIMMKNQFRRAFVRLLCMCCPRKIRRYQPTMRSKSKQCHVAAMVAASTSFGYHSVNQIDRTLMTETSQVAPA |
| Q0IGY0.1/480-738<br>Leucine-rich repeat-containing G protein-coupled receptor 4 isoform B<br>ECO:0000313<br>EMBL:ABW09404.2 | Opto Lgr4 V1   | MKTIIALSYIFCLVFAMYTDIEMNRLGKDSLMLNGTEGPNFYVFPFSNKTGVVRSPFEAPQYYLAEPWQFSMLAAYMFLIMLGFPINFLTYVRYFYKSRSNVELNYILLNLAVADLFMVFGGFTTTLTYSLHGYFVFGPTGCNLEGGFFATLGGEIALWSLVVLAIERYVVVTRPLKPRDTEKVRAIMGVAFTWVMALACAAPPLVGWSRYIPEGMQCSCGIDYYTPHEETNNESFVIYMFVVHFIPLIVIFFCYGRMLQAIRDSGGMRSTHSGRENVVARMVIIMVIAFLICWLPYAGVAFYIFTHQGSDFGPIFMTIPAFFAKTSAVYNPVIYIMMKNQFRQQLRRYCHTLPSCSLVNNETR SQTQTAYESGLSVSLAHLGGGVGGGSGRKRMSHRQMSYLTETSQVAPA                                                                                                    |
| E1JJ17.1/118-381<br>Tachykinin-like receptor at 99D isoform B<br>ECO:0000313<br>EMBL:ACZ95066.1                             | Opto Tk99D V1  | MKTIIALSYIFCLVFAMYTDIEMNRLGKDSLMLNGTEGPNFYVFPFSNKTGVVRSPFEAPQYYLAEPWQFSMLAAYMFLIMLGFPINFLTYVVMTTKRMRTVLNYILLNLAVADLFMVFGGFTTTLTYSLHGYFVFGPTGCNLEGGFFATLGGEIALWSLVVLAIERYVVVIRPLQPRMSKRCAIMGVAFTWVMALACAAPPLVGWSRYIPEGMQCSCGIDYYTPHEETNNESFVIYMFVVHFIPLIVIFFCYGRVGIELWGSKTIGEPTPRQVENVRSKRRVVRMVIIMVIAFLICWLPYAGVAFYIFTHQGSDFGPIFMTIPAFFAKTSAVYNPVIYIMMKNQFRYGFKMFVRWCLFVRVGTEPFSRRENLTSTRYSCSGSPDHNRIRKNDTQKSILYTCPSSPKSHRISHSGRSA TLRNSLPAESLSSGGGGGHRKRLSYQQEMQQRWSPNSATAVTNSS STANTTQLLSTETSQVAPA                             |

| GPCR source sequence                                                                                           | Opto variant          | Protein sequence of generated optoXR chimera (Rho/target receptor residues)                                                                                                                                                                                                                                                                                                                                                                                                                                                                                                                                                                                                                                                                                                                                                                  |
|----------------------------------------------------------------------------------------------------------------|-----------------------|----------------------------------------------------------------------------------------------------------------------------------------------------------------------------------------------------------------------------------------------------------------------------------------------------------------------------------------------------------------------------------------------------------------------------------------------------------------------------------------------------------------------------------------------------------------------------------------------------------------------------------------------------------------------------------------------------------------------------------------------------------------------------------------------------------------------------------------------|
| E1JGM2.2/107-533 5-hydroxytryptamine (Serotonin) receptor 1B isoform D<br>ECO:0000313<br>EMBL:ACZ94473.2       | <b>Opto 5-HT1B V1</b> | MKTIIALSYIFCLVFAMYTDIEMNRLGKDSLMLNGTEGPNFYVPPFSNKTGVVRSPFEAPQYYLAEPWQFSMLAAYMFLIMLGFPINFLTYVILERNLQNVLNYYLLNLAVADLFMVFGGFTTTLYTSLHGYFVFGPTGCNLEGGFFATLGGEIALWSLVVLAIERYYYYV <b>TNIDYNLRT</b> PRAIMGVAFTWVMALACAAPPLVGWSRYIPEGMQCSCGIDYYTPHEETNNESFVIYMFVVHFIPLIVIFFCYG <b>KIYIARKRIQ RRAQKSFNVTLETDCDS</b> AVRELKKERSKRAERKRL <b>EAGERT</b> PVDGDG <b>TGGQLQRTRKRM</b> RICFGRNTNTANVYRTSNANEIITLSQQVAHATQHHLI <b>ASHLNAITPLAQSIAMGGV</b> GCLTTTT <b>PSEKALSGAGTVAGAVAGGSGSGS GEEGAGTEGKNAGVGLGGV</b> LASIANPHQKLAKRRQLLEAKRERKAARMV IIMVIAFLICWLPYAGVAFYIFTHQGSDFGPIFMTIPAFFAKTSAVYNPVIYIMM NKQ <b>FRRAFKRILFGRKAAARARS</b> AKITETSQVAPA                                                                                                                                                                                                     |
| Q7KTL9.1/55-319 Adipokinetic hormone receptor isoform C<br>ECO:0000313<br>EMBL:AAS64647.1                      | <b>Opto AkhR V1</b>   | MKTIIALSYIFCLVFAMYTDIEMNRLGKDSLMLNGTEGPNFYVPPFSNKTGVVRSPFEAPQYYLAEPWQFSMLAAYMFLIMLGFPINFLTYV <b>LTKRRLRGPLRL</b> NYILLNLAVADLFMVFGGFTTTLYTSLHGYFVFGPTGCNLEGGFFATLGGEIALWSLVVLAIERYYYY <b>LKPLKRSYNR</b> GRAIMGVAFTWVMALACAAPPLVGWSRYIPEGMQCSCGIDYYTPHEETNNESFVIYMFVVHFIPLIVIFFCYG <b>AIYLEIY RKSQRVLKD</b> VIAER <b>FRRSND</b> DVLS <b>RAKKR</b> TLRMVIMVIAFLICWLPYAGVAFYIFTHQGSDFGPIFMTIPAFFAKTSAVYNPVIYIMM <b>NKQFRMNNNNPSVNN RHTSLSNRLDSS</b> NQLMQKQLT <b>NNSLLN</b> GRGQVMAAAVS <b>ATT</b> KLANVVSL <b>KGTANGNGSAAAAGTVPITP</b> PLTVTIAPLATDDEAN <b>DD</b> SCLSAVTIRCQDQ <b>SPIRQKCGDS</b> IELTSVVKTETSQVAPA                                                                                                                                                                                                                            |
| Q9VBP0.2/447-704 Leucine-rich repeat containing G protein-coupled receptor 3<br>ECO:0000313<br>EMBL:AAF56490.2 | <b>Opto Lgr3 V1</b>   | MKTIIALSYIFCLVFAMYTDIEMNRLGKDSLMLNGTEGPNFYVPPFSNKTGVVRSPFEAPQYYLAEPWQFSMLAAYMFLIMLGFPINFLTYV <b>RFIYRDEN</b> VALNYILLNLAVADLFMVFGGFTTTLYTSLHGYFVFGPTGCNLEGGFFATLGGEIALWSLVVLAIERYYYY <b>ADPFRGHR</b> SIGNRAIMGVAFTWVMALACAAPPLVGWSRYIPEGMQCSCGIDYYTPHEETNNESFVIYMFVVHFIPLIVIFFCYG <b>ALLISWR TRSATPLTLLDCE</b> FARMVIMVIAFLICWLPYAGVAFYIFTHQGSDFGPIFMTIPAFFAKTSAVYNPVIYIMM <b>NKQFRNQIFLRG</b> WKKITSR <b>KRAEAG</b> NGNVATT <b>TTGTATGSSQHPDD</b> FTIFAKAAMRCHTETSQVAPA                                                                                                                                                                                                                                                                                                                                                                     |
| Q9VW75.2/80-236 Short neuropeptide F receptor isoform B<br>EMBL:AGB94779.1                                     | <b>Opto sNPFR V1</b>  | MKTIIALSYIFCLVFAMYTDIEMNRLGKDSLMLNGTEGPNFYVPPFSNKTGVVRSPFEAPQYYLAEPWQFSMLAAYMFLIMLGFPINFLTYV <b>VLRN</b> RAMQ <b>TVTN</b> IFITNLALS <b>DLN</b> YILLNLAVADLFMVFGGFTTTLYTSLHGYFVFGPTGCNLEGGFFATLGGEIALWSLVVLAIERYYYY <b>VIYPFHPRM</b> KLSTAIMGVAFTWVMALACAAPPLVGWSRYIPEGMQCSCGIDYYTPHEETNNESFVIYMFVVHFIPLIVIFFCYG <b>WISVKLNQRARAKPG</b> SKSS <b>RREEAD</b> DR <b>KKRT</b> NRMVIMVIAFLICWLPYAGVAFYIFTHQGSDFGPIFMTIPAFFAKTSAVYNPVIYIMM <b>NKQFRYAWL NENFRKEFKH</b> VLPCFNPS <b>NNNI</b> NITRGYN <b>RS</b> DRNT <b>CGPRLH</b> HGKGD <b>GGM GGS</b> LDADDQ <b>DENGITQET</b> CLPKEK <b>LLIIP</b> REPTY <b>GNGT</b> GAVSPIL <b>S</b> GRGIN AALVHGGD <b>HQMHQLQPS</b> HHQ <b>VEL</b> TRRIR <b>RTDE</b> TGD <b>YLD</b> SGDEQ <b>TVE VRF</b> SETPFV <b>ST</b> DNTT <b>GIS</b> ILET <b>STSHC</b> QDSD <b>VM</b> VELGEAIGAG <b>GGAEL</b> GRRIN TETSQVAPA |

## Supplementary References

1. Kim, J.-M. *et al.* Light-Driven Activation of  $\beta$  2 -Adrenergic Receptor Signaling by a Chimeric Rhodopsin Containing the  $\beta$  2 -Adrenergic Receptor Cytoplasmic Loops †. *Biochemistry* **44**, 2284–2292 (2005).
2. Airan, R. D., Thompson, K. R., Fenno, L. E., Bernstein, H. & Deisseroth, K. Temporally precise in vivo control of intracellular signalling. *Nature* **458**, 1025–1029 (2009).
3. Siuda, E. R. *et al.* Optodynamic simulation of  $\beta$ -adrenergic receptor signalling. *Nat Commun* **6**, 8480 (2015).
4. Siuda, E. R., Al-Hasani, R., McCall, J. G., Bhatti, D. L. & Bruchas, M. R. Chemogenetic and Optogenetic Activation of G $\alpha$ s Signaling in the Basolateral Amygdala Induces Acute and Social Anxiety-Like States. *Neuropsychopharmacology* **41**, 2011–2023 (2016).
5. Adamsky, A. *et al.* Astrocytic Activation Generates De Novo Neuronal Potentiation and Memory Enhancement. *Cell* **174**, 59-71.e14 (2018).
6. Iwai, Y. *et al.* Transient Astrocytic Gq Signaling Underlies Remote Memory Enhancement. *Front Neural Circuits* **15**, (2021).
7. Gerasimov, E. *et al.* Optogenetic Activation of Astrocytes—Effects on Neuronal Network Function. *International Journal of Molecular Sciences* 2021, Vol. 22, Page 9613 **22**, 9613 (2021).
8. Barish, P. A. *et al.* Design and functional evaluation of an optically active  $\mu$ -opioid receptor. *Eur J Pharmacol* **705**, 42–48 (2013).
9. Siuda, E. R. *et al.* Spatiotemporal Control of Opioid Signaling and Behavior. *Neuron* **86**, 923–935 (2015).
10. Castro, D. C. *et al.* An endogenous opioid circuit determines state-dependent reward consumption. *Nature* 2021 598:7882 **598**, 646–651 (2021).
11. Gunaydin, L. A. *et al.* Natural Neural Projection Dynamics Underlying Social Behavior. *Cell* **157**, 1535–1551 (2014).
12. Xu, Y. *et al.* Optogenetic control of chemokine receptor signal and T-cell migration. *Proc Natl Acad Sci U S A* **111**, 6371–6376 (2014).
13. Li, P. *et al.* Optogenetic activation of intracellular adenosine A2A receptor signaling in the hippocampus is sufficient to trigger CREB phosphorylation and impair memory. *Mol Psychiatry* **20**, 1481 (2015).
14. Li, Y. *et al.* Optogenetic Activation of Adenosine A2A Receptor Signaling in the Dorsomedial Striatopallidal Neurons Suppresses Goal-Directed Behavior. *Neuropsychopharmacology* **41**, 1003–1013 (2016).
15. van Wyk, M., Pielecka-Fortuna, J., Löwel, S. & Kleinlogel, S. Restoring the ON Switch in Blind Retinas: Opto-mGluR6, a Next-Generation, Cell-Tailored Optogenetic Tool. *PLoS Biol* **13**, 1–30 (2015).
16. Kralik, J., van Wyk, M., Stocker, N. & Kleinlogel, S. Bipolar cell targeted optogenetic gene therapy restores parallel retinal signaling and high-level vision in the degenerated retina. *Communications Biology* 2022 5:1 **5**, 1–15 (2022).

17. Čapek, D. *et al.* Light-activated Frizzled7 reveals a permissive role of non-canonical wnt signaling in mesendoderm cell migration. *Elife* **8**, (2019).
