# Supplementary material for: Optimized design and in vivo application of optogenetically functionalized Drosophila dopamine receptors
Source: PubMed Central journal article supplement (PMC10730509; doi:10.1038/s41467-023-43970-0), 2023-12-19
Supplement: 41467_2023_43970_MOESM3_ESM.pdf [file 41467_2023_43970_MOESM3_ESM.pdf]

## Description of Additional Supplementary Files

### **Supplementary Movie Legends:**

**Supplementary Movie 1:** Blue light induced rolling of larvae expressing bPAC in nociceptors (ppk-Gal4>UAS-bPAC)

**Supplementary Movie 2:** Blue light induced rolling of larvae expressing optoDop1R1V1 in nociceptors (ppk-Gal4>UASoptoDop1R1V1)

**Supplementary Movie 3:** Blue light induced rolling of larvae expressing optoDop1R1V2 in nociceptors (ppk-Gal4>UASoptoDop1R1V2)

**Supplementary Movie 4:** Blue light induced rolling of larvae expressing optoDop1R2V2 in nociceptors (ppk-Gal4>UASoptoDop1R2V2)

**Supplementary Movie 5:** Blue light induced rolling of larvae expressing CsChrimson in nociceptors (ppk-Gal4>UASCsChrimson).

**Supplementary Movie 6:** cAMP response of blue light induced bPAC activation in the mushroom body soma and medial lobe region (H24-Gal4>UAS-bPAC,UAS-Gflamp1).

**Supplementary Movie 7:** cAMP response of blue light induced optoDop1R1V2 activation in the mushroom body soma and medial lobe region (H24-Gal4>UAS-optoDop1R1V2,UAS-Gflamp1).

**Supplementary Movie 8:** Calcium response of blue light induced optoDop1R2V2 activation in the mushroom body soma and medial lobe region (H24-Gal4>UAS-optoDop1R2V2,UAS-GCaMP6s).

**Supplementary Movie 9:** Locomotion of rotenone-treated larvae expressing optoDop1R1V2 in the endogenous pattern of Dop1R1 using a knock-in Gal4 line (Dop1R1KO-Gal4>UAS-optoDop1R1V2). Larvae were tracked in the dark (magenta tracks) and subsequently upon green light illumination (green tracks).
